# Supplementary material for: Genetic circuit characterization and debugging using RNA‐seq
Source: PubMed Central journal article supplement (PMC5731345; doi:10.15252/msb.20167461), 2017-11-09
Supplement: MSB-13-952-s001.pdf [file MSB-13-952-s001.pdf]

Appendix for:

## **Genetic circuit characterization and debugging using RNA-seq**

*Thomas E. Goroehowski, Amin Espah Borujeni, Yongjin Park, Alec A.K. Nielsen, Jing Zhang, Bryan S. Der, D. Benjamin Gordon and Christopher A. Voigt*

|                                                                                                         |           |
|---------------------------------------------------------------------------------------------------------|-----------|
| <b>Appendix Text</b>                                                                                    | <b>2</b>  |
| Appendix Text S1: Transcription profile correction method                                               | 2         |
| Appendix Text S2: Measurement of ribozyme performance from RNA-seq data                                 | 5         |
| <b>Appendix Figures</b>                                                                                 | <b>6</b>  |
| Appendix Figure S1: Distribution of fragment length versus circuit position                             | 6         |
| Appendix Figure S2: Transcription profile replicates, measured on different days                        | 7         |
| Appendix Figure S3: Sequenced fragment length distributions                                             | 8         |
| Appendix Figure S4: Ribozyme transcription profiles for cells grown in culture tubes                    | 9         |
| Appendix Figure S5: Antisense transcription across the circuit                                          | 10        |
| Appendix Figure S6: Transcription profiles for parts when cells are grown in Erlenmeyer flasks          | 11        |
| Appendix Figure S7: Sensor and gate response functions when cells are grown in Erlenmeyer flasks        | 12        |
| Appendix Figure S8: Circuit plasmid                                                                     | 13        |
| <b>Appendix Tables</b>                                                                                  | <b>14</b> |
| Appendix Table S1: Ribozyme part characterization in culture tubes                                      | 14        |
| Appendix Table S2: Top 25 down and up regulated genes for states where four circuit genes are expressed | 15        |
| Appendix Table S3: Promoter and terminator part characterization in Erlenmeyer flasks                   | 16        |
| Appendix Table S4: Sensor and gate response function parameters in Erlenmeyer flasks                    | 17        |
| Appendix Table S5: Genetic part sequences                                                               | 18        |
| <b>Appendix References</b>                                                                              | <b>21</b> |

## **Appendix Text S1: Transcription profile correction method**

RNA-seq measurements generate millions of fragments that are computationally mapped to sequences for the genetic circuit and host genome. The transcription profile is created via this process. This is adequate for many applications in systems biology where gene expression can be inferred by averaging the profile across the length of a gene. However, there is a bias that occurs during the mapping process that causes a gradual decline at the 5'- and 3'- ends of each transcription unit. By definition, promoters and terminators occur at these boundaries. While it is easy to qualitatively detect that these parts exist (and this is the basis for algorithms to detect promoters/terminators in the genome), the decline complicates the quantitative calculation of their strength, which is important in synthetic biology. Therefore, we developed a method to correct for these edge effects that utilizes the empirical fragment length distribution from the RNA-seq experiment. The distribution is used to create a single correction factor that is applied to all of the 5'- and 3'- ends of the transcripts in the circuit. After this process, the equations to calculate part strength are applied. Note that this correction factor is only applied to the transcripts corresponding to the gates in the circuit; it is not applied to internal promoters, antisense transcription, or genomic expression (in these cases, it is not necessary to calculate part strength). Below, when we refer to the transcripts in the circuit, this only encompasses transcripts originating from transcription start sites within the input/output promoters in the gates.

Each RNA-seq experiment has a unique fragment length distribution, which depends on many growth-related and growth-unrelated processes (Klumpp et al, 2009; Roberts et al, 2011). Inside cells, the length and abundance of mRNA transcripts at steady-state is controlled by a balance between several processes such as transcriptional bursting, elongation and termination, RNA polymerase fall-off, and mRNA degradation. Outside the cells, after total RNA extraction, mRNA transcripts undergo several post-processing modifications such as fragmentation, reverse transcription, PCR amplification, and DNA selection before being sequenced using high-throughput sequencing systems. Importantly, these post-processing steps will define the final shape of fragment length distribution. Two main contributing factors to this shape are the positional biases introduced during the post-processing and sequencing events, and the loss of RNA fragments (mostly occurring during the DNA selection step).

The profile bias at the ends of a transcript occurs because a fragment is more likely to map at the center of the transcript and less likely at the ends. Differences in the fragment length distribution impact the shape of the profile. Long fragments have the effect of exaggerating the bias (it extends deeper into the transcript from each end) as compared to short ones. Here, we sought to create a simple method that calculates a correction factor based on the fragment length distribution and apply it to all the transcription

units in the circuit. Alternatively, the fragment length distribution for each transcription unit, as opposed to the experiment as a whole, could be calculated and applied. However, we found that this was unnecessary because the transcription units are all about the same size due to the fact that they encode single TetR-family repressors.

The first step in our correction method is to generate a distribution of all the fragment lengths mapped across the circuit and the genome (Appendix Figure S3). Because we use paired-end sequencing, the position of the start and end of each fragment is known, enabling the length to be directly calculated. We then consider a hypothetical 2000 nt transcription unit to generate a calculated profile  $T(x)$  that captures the expected curvature across a transcript within the transcription profile. This is generated by stochastically selecting a number of lengths (100,000) from the fragment length distribution and randomly mapping fragments of these lengths to the hypothetical transcription unit.  $T(x)$  is then produced by counting the number of mapped fragments per nucleotide (Box 1). In order to generate a general correction factor profile  $C(x)$ , the hypothetical profile  $T(x)$  is normalized with respect to its maximum. We found that the impact of the correction is negligible after  $\sim 400$  nt, in other words  $C(x) \rightarrow 1$ , so only the first 500 nt of  $C(x)$  are used. This correction factor is only based on the length of the fragments and does not consider their sequence. Thus, the effect is identical at the 5'- and 3'- ends of the transcript and the same correction factor can be applied to both ends.

Next, the transcription profile  $P(x)$  is generated for transcription units across the circuit. It is not applied to regions where part strengths do not have to be calculated, such as genomically-encoded genes. First, fragments from the RNA-seq data mapping within the boundaries of a single transcription unit are identified. These are used to generate  $P(x)$  by counting the number of fragments covering each nucleotide  $x$ . To correct the curvature present at the ends of each transcription unit (Box 1), we divide the first and last 500 nt of each transcription unit in  $P(x)$  by  $C(x_n)$ , where  $x_n$  is the distance in nucleotides to the nearest end of the transcription unit. Finally, all remaining fragments from the RNA-seq data (*i.e.*, those mapping outside the previously considered transcription units or spanning transcription unit boundaries) are combined with  $P_c(x)$  to produce the final transcription profile. To enable comparison of absolute changes in the profiles between samples,  $M(x)$  is further normalized by  $F = m/10^6$ , where  $m$  is the effective library size calculated for each RNA-seq experiment using a trimmed mean of M-values (TMM) approach (Robinson & Oshlack, 2010) (Dataset EV1).

This method accurately corrects the curvature at the two ends of all transcription units in the circuit. However, issues were observed for the *LitR* and *BM3R1* genes for state  $-/-/+$  when grown in culture tubes (specifically for biological replicate 1). For these genes, the 3'-end of the corrected profiles unexpectedly

rises (Figure 2D). This was due to a large number of fragments having their 3'-end mapping to the 3'-end of these transcription units (Appendix Figure S1). This feature was only present for one of the biological replicates and not seen across the other samples (Appendix Figure S2).

## **Appendix Text S2: Measurement of ribozyme performance from RNA-seq data**

Ribozyme insulators were present at all promoter-RBS junctions to cleave variable 5' sequences generated by differing upstream promoters. Inspection of the transcription profiles revealed that for both single and pairs of promoters, increases in the profiles occurred not at the transcription start site ( $x_{TSS}$ ) of each promoter, but instead at the cut-site of the nearest downstream ribozyme insulator (Appendix Figure S5B). The reason for this could be traced to the preparation of the sequencing libraries. Because ribozymes are located near the start of the 5'-UTR of each transcript, after cleavage, a short ~80 bp fragment is generated in addition to a longer fragment containing the downstream gene. Short-cleaved fragments were undetected during sequencing because reverse transcribed cDNA fragments of less than 100 bp were filtered during library preparation (Appendix Figure S4). This resulted in the transcription profiles lacking information for the beginning of these transcripts.

A byproduct of this filtering was that it allowed us to characterize ribozyme cleavage. Because short cleaved RNA fragments were filtered and uncleaved fragments were captured during sequencing, by comparing the transcription profile directly after the cut-site (capturing both cleaved and uncleaved fragments) to the transcription profile at the beginning of the ribozyme (only capturing uncleaved fragments), the fraction of cleaved fragments  $p_c$  can be calculated as

$$p_c = \frac{\sum_{i=x_C+1}^{x_C+n} M(i) - \sum_{i=x_0-1}^{x_0-n} M(i)}{\sum_{i=x_C-1}^{x_C-n} M(i) - \sum_{i=x_0-1}^{x_0-n} M(i)}. \quad (S1)$$

Here,  $x_C$  is the position of the ribozyme's cut-site,  $x_0$  is the start position of the first upstream promoter, and  $n$  is the window length (Appendix Figure S5A). Transcripts originating from upstream of the ribozyme's associated promoter (Appendix Figure S5A) are subtracted because cleavage of these will generate fragments with a length that is too large to be filtered during library preparation and would thus confound the calculation.

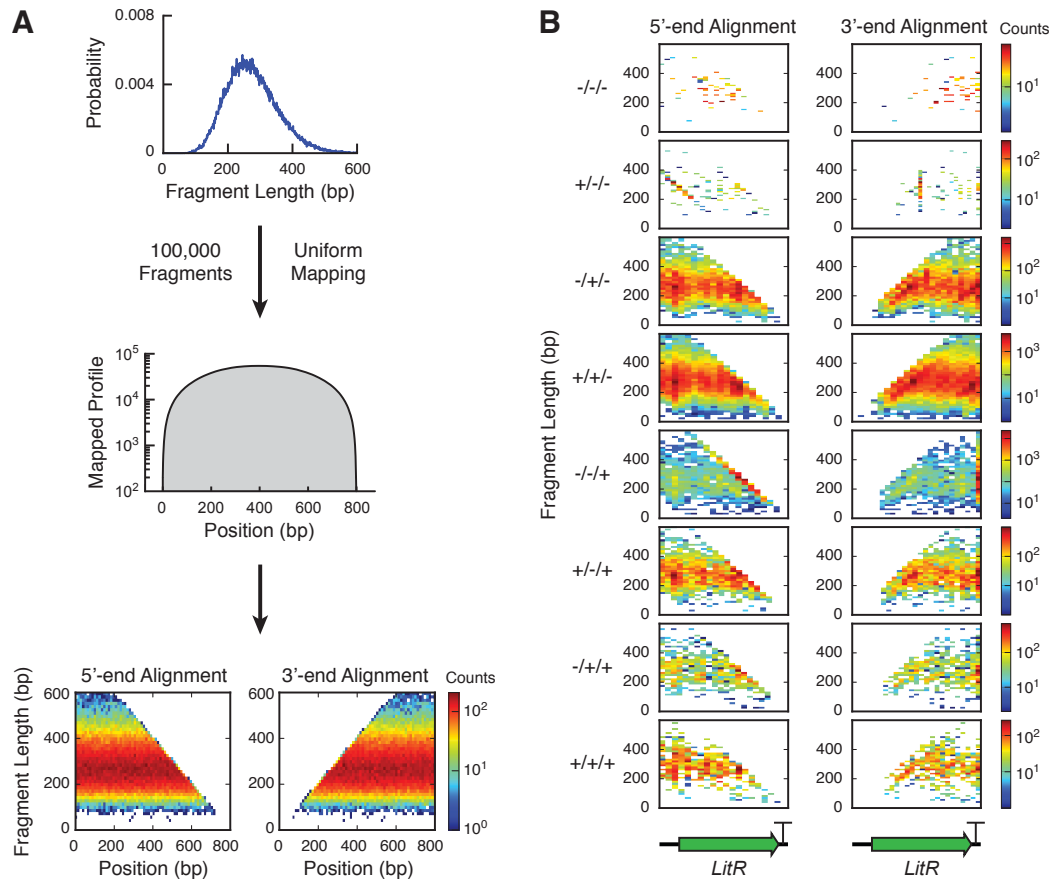

**Appendix Figure S1: Distribution of fragment length versus circuit position.** (A) A hypothetical fragment length distribution was generated by randomly selecting 100,000 values from a gamma probability density function that mimics the experimental fragment length distributions (shape = 12 and scale = 23). Fragments were *uniformly* mapped to random positions within an 800 nt hypothetical transcription unit, and a transcription profile generated by counting the number of fragments spanning each nucleotide position. Heat-maps show how fragments of different lengths are distributed across the transcription unit. At all positions, the number of mapped fragments with specific lengths follows the original fragment length distribution. The right-angled trapezoid shape of the heat-maps is the result of fragments having to map within the boundaries of the transcription unit. (B) Distribution of length versus position are shown for fragments mapped exclusively within the borders of *LitR*. Data shown for experiments performed in culture tubes. *LitR* is actively transcribed for six induction states (-/+/-, +/-/-, -/-/+, +/-/+, -/+/+ and +/-/+). These states show a near uniform mapping and no positional bias, apart from state -/-/+. For this state, a significant number of fragments map to the 3'-end of *LitR*, which explains the rise in the corrected transcription profiles at this point (Figure 2D).

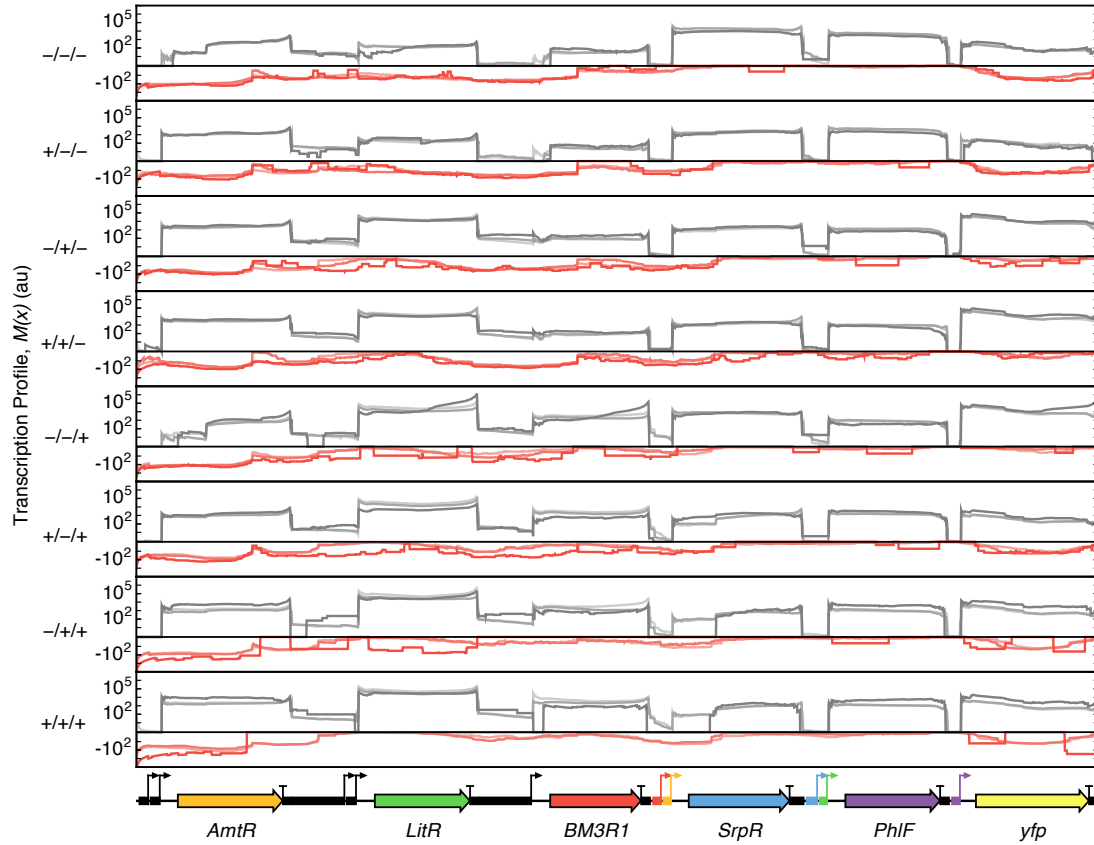

**Appendix Figure S2: Transcription profile replicates, measured on different days.** Separate lines are shown for each of the three biological replicates. Transcription profiles for the sense strand are colored grey and red for the antisense strand.

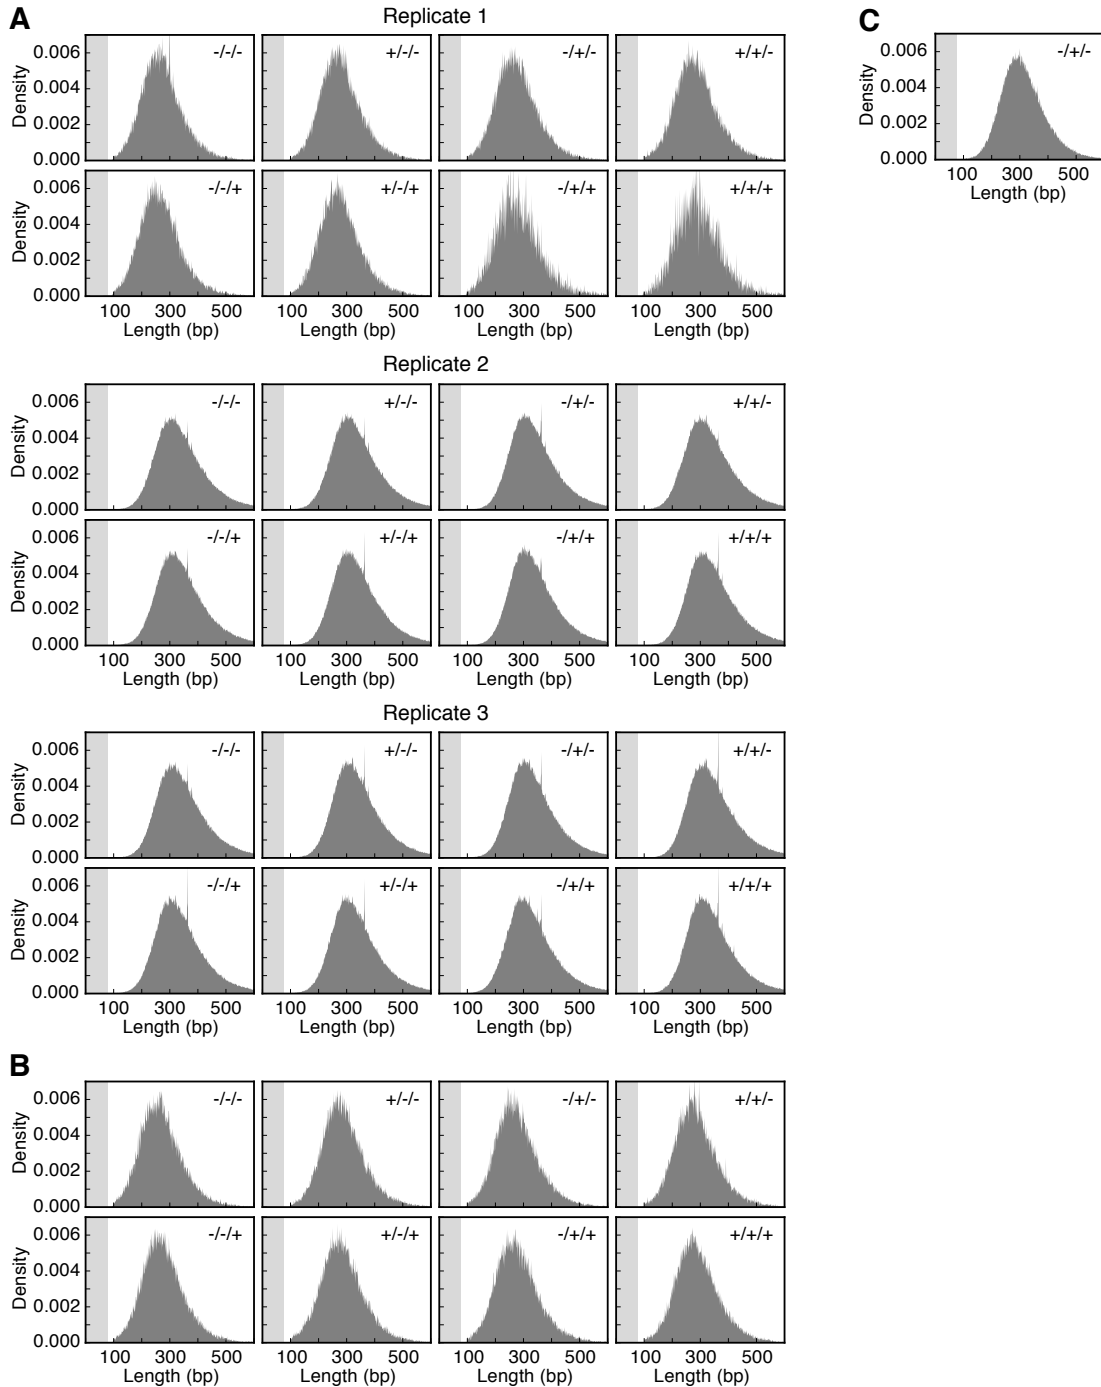

**Appendix Figure S3: Sequenced fragment length distributions.** (A) Circuit grown in culture tubes (data shown for three biological replicates) and (B) Erlenmeyer flasks for all combinations of inputs. (C) Modified version of the circuit grown in culture tubes. Each distribution shows the combination of inputs (IPTG/aTc/Ara) in the top right corner. The shaded regions (0 to 78 bp) represent the length of the longest 5'-UTR fragment produced after ribozyme cleavage.



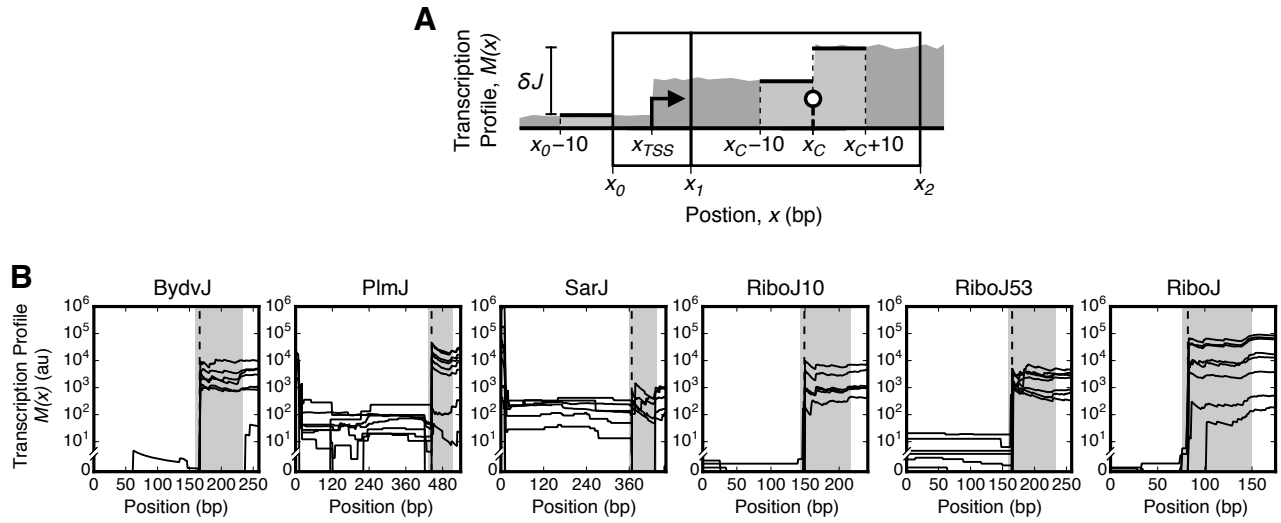

**Appendix Figure S4: Ribozyme transcription profiles for cells grown in culture tubes. (A)** Method for characterizing ribozyme cleavage (Appendix Text S2). The fraction of cleaved fragments by the ribozyme is calculated as  $p_c = \left[ \sum_{i=x_C+1}^{x_C+n} M(i) - \sum_{i=x_0-1}^{x_0-n} M(i) \right] / \left[ \sum_{i=x_C-1}^{x_C-n} M(i) - \sum_{i=x_0-1}^{x_0-n} M(i) \right]$  and the activity of the associated promoter is given by  $\delta J = \frac{\gamma}{n} \left[ \sum_{i=x_C+1}^{x_C+n} M(i) - \sum_{i=x_0-1}^{x_0-n} M(i) \right]$  with  $n = 10$  bp. **(B)** Transcription profiles for the ribozyme parts. Lines show the transcription profile for each of the 8 input states. Shaded regions denote the location of the ribozyme and dashed line shows the cleavage site. Data shown for biological replicate 1.

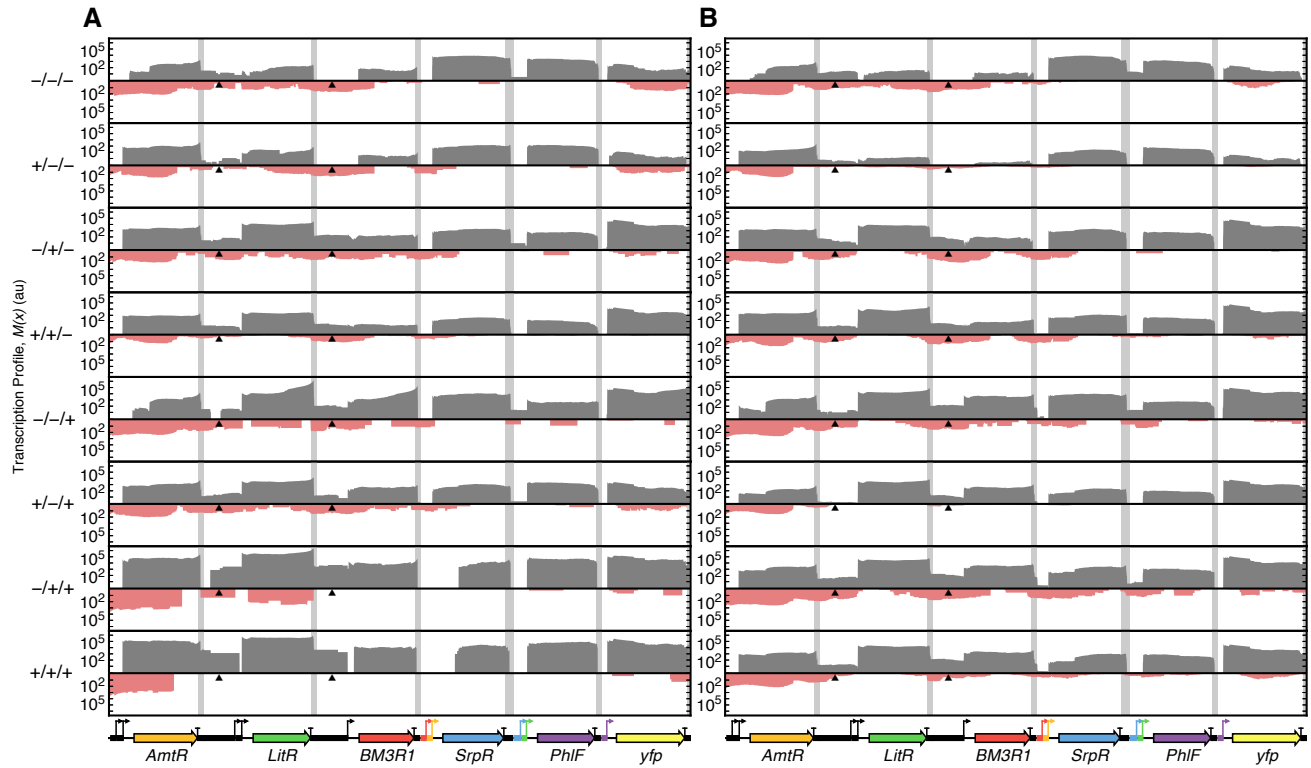

**Appendix Figure S5: Antisense transcription across the circuit.** Data for all input states shown for cells grown under **(A)** culture tube (data shown for biological replicate 1) and **(B)** Erlenmeyer flask conditions. Transcription profiles are shown for both sense (gray) and antisense (red) strands. Light gray shaded regions denote the location of terminator parts. Triangles mark the antisense promoter present within  $P_{BAD}$ .

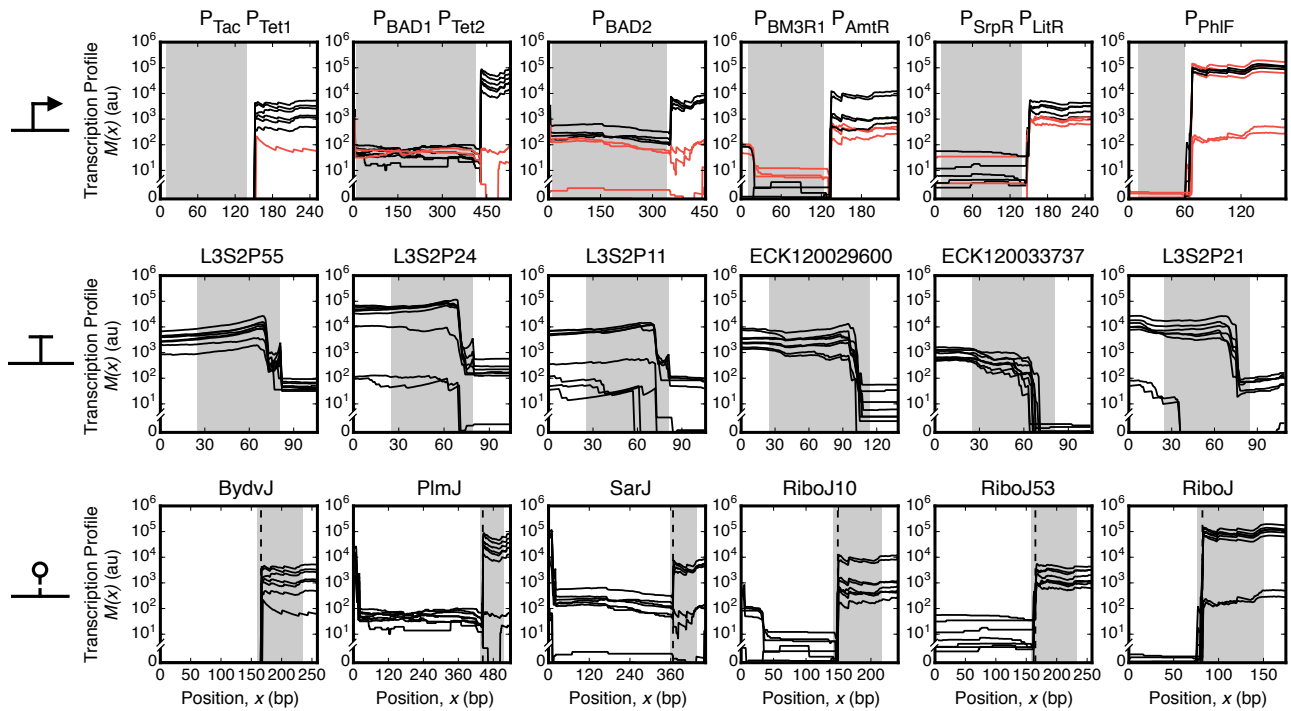

**Appendix Figure S6: Transcription profiles for parts when cells are grown in Erlenmeyer flasks.** Lines show the transcription profile for each of the 8 input states. Shaded regions denote the location of the relevant part. For promoters, the lines are black when the promoter is expected to be on and red when it is expected to be off. The ribozyme cleavage site is denoted by a dashed line.

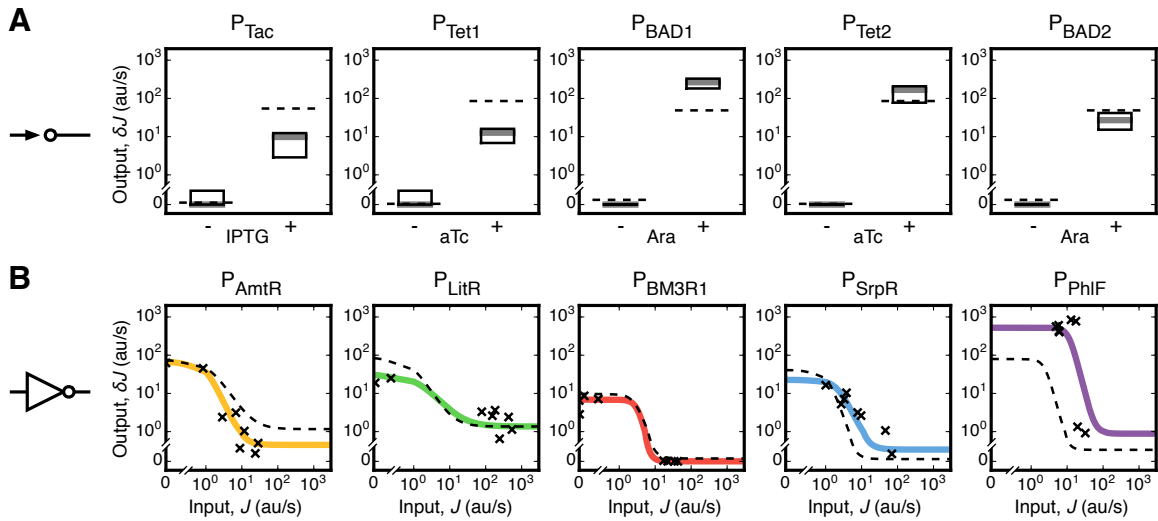

**Appendix Figure S7: Sensor and gate response functions when cells are grown in Erlenmeyer flasks. (A)** The response of the output promoters of the sensors are shown in the presence and absence of each inducer. The dashed lines show the sensor outputs measured in isolation (Nielsen et al, 2016). The boxes show the median (grey line) and range of promoter activities measured for the four states where it is off ( $\delta J_{off}$ ) and four where it is on ( $\delta J_{on}$ ). **(B)** Solid colored lines show the response functions of the gates obtained by fitting the promoter activities to the RNA-seq data (circles denote the measured values for the 8 input states). The dashed lines show the output of the gate measured in isolation (Nielsen et al, 2016). The fit parameters for the response functions are provided in Appendix Table S4.

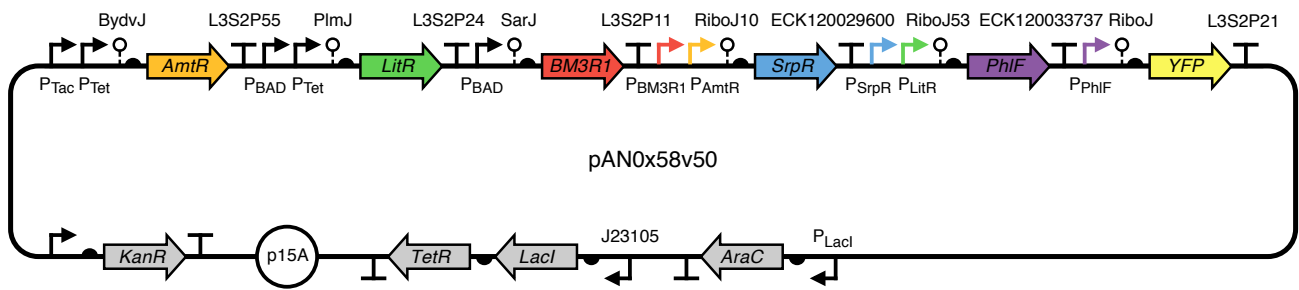

**Appendix Figure S8: Circuit plasmid.** Parts names are shown for all genes, promoters, terminators, and ribozymes. Part sequences are provided in Appendix Table S5.

**Appendix Table S1: Ribozyme part characterization in culture tubes.**

| Ribozyme | Genetic Context          |                        |
|----------|--------------------------|------------------------|
|          | Isolation <sup>a,b</sup> | Circuit <sup>b,c</sup> |
| BydvJ    | 0.98                     | 0.99 ± 0.0             |
| PlmJ     | 0.97                     | 0.99 ± 0.0             |
| SarJ     | 0.99                     | 0.99 ± 0.0             |
| RiboJ10  | 0.98                     | 0.99 ± 0.0             |
| RiboJ53  | 0.99                     | 0.98 ± 0.0             |
| RiboJ    | 0.97                     | 0.99 ± 0.04            |

a. Measurements from Nielsen et al (2016).

b. Ribozyme cleavage values given as a fraction of the total cleaved to 2 s.f.

c. Average and standard deviation calculated from three replicates performed on different days for states where the transcript is expressed.

**Appendix Table S2: Top 25 down and up regulated genes for states where four circuit genes are expressed**

| Gene        | log <sub>2</sub> fold-change | Description                                              | Related pathways and role                    |
|-------------|------------------------------|----------------------------------------------------------|----------------------------------------------|
| <i>yncA</i> | -5.0                         | 50S ribosomal protein L36 paralog                        | Protein acetylation                          |
| <i>flu</i>  | -3.6                         | Self-recognizing antigen 43 (Ag43) autotransporter       | Integral component of membrane               |
| <i>ygiP</i> | -3.6                         | DNA-binding transcriptional activator TtdR               | –                                            |
| <i>yqeC</i> | -3.8                         | Uncharacterized protein                                  | –                                            |
| <i>ydcZ</i> | -3.3                         | Uncharacterized protein                                  | –                                            |
| <i>napF</i> | -4.2                         | Ferredoxin-type protein                                  | Response to oxidative stress                 |
| <i>ndk</i>  | -2.4                         | Nucleoside diphosphate kinase                            | Nucleotide biosynthesis                      |
| <i>nikA</i> | -3.4                         | Ni(2+) ABC transporter periplasmic binding protein       | Nickel cation transport                      |
| <i>dmsA</i> | -3.8                         | Dimethyl sulfoxide reductase subunit A                   | Anaerobic respiration                        |
| <i>tpx</i>  | -2.0                         | Lipid hydroperoxide peroxidase                           | Cellular response to oxidative stress        |
| <i>rraA</i> | -2.8                         | Ribonuclease E inhibitor protein A                       | RNA metabolism                               |
| <i>ansB</i> | -2.7                         | Asparaginase II                                          | Amino acid metabolism                        |
| <i>yjiI</i> | -3.8                         | Uncharacterized protein                                  | –                                            |
| <i>yedE</i> | -3.3                         | Uncharacterized protein                                  | –                                            |
| <i>hypB</i> | -3.1                         | GTP hydrolase (nickel liganding into hydrogenases)       | Protein maturation and complex assembly      |
| <i>yccM</i> | -3.0                         | Uncharacterized protein                                  | –                                            |
| <i>napA</i> | -3.6                         | Periplasmic nitrate reductase subunit                    | Anaerobic respiration                        |
| <i>yhbU</i> | -3.5                         | Uncharacterized protein                                  | –                                            |
| <i>yjiW</i> | -3.2                         | Uncharacterized protein                                  | –                                            |
| <i>yhjX</i> | -2.5                         | Uncharacterized protein                                  | –                                            |
| <i>sodB</i> | -1.6                         | Superoxide dismutase (Fe)                                | Oxidation-reduction process                  |
| <i>csiE</i> | -2.4                         | Stationary phase inducible protein                       | Transcription regulation                     |
| <i>pepT</i> | -2.4                         | Peptidase T                                              | Proteolysis                                  |
| <i>yiaU</i> | -2.4                         | Uncharacterized protein                                  | –                                            |
| <i>yncA</i> | -5.0                         | L-amino acid N-acyltransferase                           | Protein acetylation                          |
| <i>nrdE</i> | 3.6                          | Ribonucleoside-diphosphate reductase 2, α subunit dimer  | DNA replication                              |
| <i>nrdF</i> | 3.7                          | Ribonucleoside-diphosphate reductase 2, β subunit dimer  | DNA replication                              |
| <i>nrdI</i> | 4.1                          | Flavodoxin                                               | Protein modification                         |
| <i>yjiZ</i> | 4.3                          | Uncharacterized protein                                  | –                                            |
| <i>rcaA</i> | 5.8                          | DNA-binding transcriptional activator                    | Transcriptional regulation of colonic acid   |
| <i>fhuE</i> | 3.0                          | Ferric coprogen/ferric rhodotorulic acid transporter     | Iron ion homeostasis                         |
| <i>yedA</i> | 3.4                          | Uncharacterized protein                                  | –                                            |
| <i>sufD</i> | 2.0                          | Fe-S cluster scaffold complex subunit                    | Response to oxidative stress                 |
| <i>nrdH</i> | 3.1                          | Glutaredoxin-like protein                                | Cell redox homeostasis                       |
| <i>sufS</i> | 2.0                          | L-cysteine desulfurase                                   | Sulphur compound metabolism                  |
| <i>yjbE</i> | 5.9                          | Uncharacterized protein                                  | –                                            |
| <i>add</i>  | 1.8                          | Adenosine deaminase                                      | DNA damage response and purine salvaging     |
| <i>xylF</i> | 4.8                          | Xylose ABC transporter periplasmic binding protein       | Carbohydrate transport                       |
| <i>fhuF</i> | 1.5                          | Hydroxamate siderophore iron reductase                   | Iron assimilation                            |
| <i>araJ</i> | 4.6                          | Uncharacterized protein                                  | –                                            |
| <i>eptA</i> | 2.5                          | Phosphoethanolamine transferase                          | Response to antibiotics and lipid metabolism |
| <i>acrD</i> | 2.1                          | Multidrug efflux pump RND permease                       | Response to drug and drug transport          |
| <i>yagG</i> | 1.6                          | Uncharacterized protein                                  | –                                            |
| <i>asnB</i> | 1.7                          | Asparagine synthetase B                                  | Amino acid biosynthesis                      |
| <i>yedV</i> | 2.2                          | Sensory histidine kinase                                 | DNA damage response                          |
| <i>cirA</i> | 2.0                          | Ferric dihydroxybenzoylserine outer membrane transporter | Iron assimilation                            |
| <i>sufC</i> | 2.0                          | Fe-S cluster scaffold complex subunit                    | Iron-sulfur cluster assembly                 |
| <i>ydeH</i> | 2.1                          | Diguanylate cyclase                                      | Regulation of cell motility                  |
| <i>gmd</i>  | 4.9                          | GDP-mannose 4,6-dehydratase                              | Colanic acid biosynthesis                    |
| <i>sufE</i> | 2.1                          | Sulfur acceptor for SufS cysteine desulfurase            | Response to oxidative stress                 |

**Appendix Table S3: Promoter and terminator part characterization in Erlenmeyer flasks.**

| <b>Promoter(s)</b>                    | <b>Strength<sup>a</sup></b> |
|---------------------------------------|-----------------------------|
| P <sub>Tac</sub> -P <sub>Tet1</sub>   | 6, 9                        |
| P <sub>BAD1</sub> -P <sub>Tet2</sub>  | 213, 115                    |
| P <sub>BAD2</sub>                     | 27                          |
| P <sub>BM3R1</sub> -P <sub>AmtR</sub> | 7, 45                       |
| P <sub>SrpR</sub> -P <sub>LitR</sub>  | 12, 26                      |
| P <sub>PhIF</sub>                     | 533                         |

  

| <b>Terminator</b> | <b>Strength<sup>b</sup></b> |
|-------------------|-----------------------------|
| L3S2P55           | 25                          |
| L3S2P24           | 179                         |
| L3S2P11           | 70                          |
| ECK120029600      | 260                         |
| ECK120033737      | 793                         |
| L3S2P21           | 98                          |

- a. Average promoter strengths are shown in au/s for each promoter when on. For double promoters, strengths are calculated separately when only one of the promoters is predicted to be on.
- b. Median terminator strengths are calculated for states where the upstream gene is predicted to be in an on state.



**Appendix Table S4: Sensor and gate response function parameters in Erlenmeyer flasks.**

| <b>Sensor<sup>a</sup></b> | $\delta J_{\text{off}}$              | $\delta J_{\text{on}}$               |          |          |
|---------------------------|--------------------------------------|--------------------------------------|----------|----------|
| P <sub>Tac</sub>          | 0.0                                  | 10                                   |          |          |
| P <sub>Tet1</sub>         | 0.0                                  | 13                                   |          |          |
| P <sub>Tet2</sub>         | 0.0                                  | 167                                  |          |          |
| P <sub>BAD1</sub>         | 0.0                                  | 265                                  |          |          |
| P <sub>BAD2</sub>         | 0.0                                  | 27                                   |          |          |
| <b>Gate<sup>b</sup></b>   | $\delta J_{\text{out}}^{\text{min}}$ | $\delta J_{\text{out}}^{\text{max}}$ | <i>K</i> | <i>n</i> |
| P <sub>AmtR</sub>         | 0.6                                  | 66                                   | 1.1      | 2.3      |
| P <sub>LitR</sub>         | 1.4                                  | 31                                   | 1.6      | 1.3      |
| P <sub>BM3R1</sub>        | 0.0                                  | 7                                    | 3.3      | 4.0      |
| P <sub>SrpR</sub>         | 0.4                                  | 23                                   | 2.4      | 2.3      |
| P <sub>PhIF</sub>         | 0.9                                  | 523                                  | 11.6     | 4.0      |

a. In units of au/s.

b. Parameters  $\delta J_{\text{out}}^{\text{min}}$ ,  $\delta J_{\text{out}}^{\text{max}}$  and *K* are in units au/s.

Appendix Table S5: Genetic part sequences

| Part Name | Type | DNA Sequence                                                                                                                                                                                                                                                                                                                                                                                                                                                                                                                                                                                                                                                                                                                                                                     |
|-----------|------|----------------------------------------------------------------------------------------------------------------------------------------------------------------------------------------------------------------------------------------------------------------------------------------------------------------------------------------------------------------------------------------------------------------------------------------------------------------------------------------------------------------------------------------------------------------------------------------------------------------------------------------------------------------------------------------------------------------------------------------------------------------------------------|
| AmtR      | Gene | ATGGCAGGCGCAGTTGGTCGTCCGCGTCGTAGTGCACCGCGTCGTGCAGGTA AAAATCCGCGTGAA<br>GAAATTC TGGATGCAAGCGCAGA AACTGTTTACC CGTCAGGGTTTTGCAACCACCAGTACC CATCAG<br>ATTGCAGATGCAGTTGGTATTCGT CAGGCAAGCCTGTATATCATTTTTCCGAGCAAAAACCGAAATC<br>TTTCTGACCTGCTGAAAAGCACCGTTGAACCGAGCACCGTTCTGGCAGAAGATCTGAGCACCTG<br>GATGCAGGTCCGGAATGCGTCTGTGGGCAATTGTTGCAAGCGAAGTTCGTCTGCTGCTGAGCACC<br>AAATGGAATGTTGGTCGTCTGTATCAGCTGC CGGATGTTGGTAGCGAAGAATTTGCAGAATATCAT<br>AGCCAGCGTGAAGCACTGACCAATGTTTTCTGTGATCTGGCAACCGAAATGTTGGTGATGATCCG<br>CGTGCAGAACTGCCGTTTCATATTACCATGAGCGTTATTGAAATGCGTCGCAATGATGGTAAAATT<br>CCGAGTCCGCTGAGCGCAGATAGCTGCCGGA AACCGCAATTATGCTGGCAGATGCAAGCCTGGCA<br>GTTCTGGGTGCACCGCTGCCTGCAGATCGTGT TGA AAAAACCC TGGAACTGATTAACAGGCAGAT<br>GCAAAATAA                                     |
| LitR      | Gene | ATGGATACCATTTCAGAAAGCTCCGCGTACC CGTCTGAGTCCGGA AAAACGTAAAGAACAGCTGCTG<br>GATATTGCCATTGAAGTTTTTAGCCAGCGTGGTAT TGGTCGTGGTGGTCATGCAGATATTGCAGAA<br>ATTCACACAGGTTAGCGTTGCAACCGTGT TAACTATTTTCCGACCCGTGAAGATCTGGTTGATGAT<br>GTTCTGAACAAAGTGAAAACGAGTTTACCAGTTCATCAATAACAGCATTAGCCTGGATCTGGAT<br>GTTCTGATGCAATCTGAATACCCCTGCTGCTGAACATTATTGATAGCGTTTCAGACCGCAACAAATGG<br>ATTAAGTTTGGTTTGAATGGTCAACCAGCACCCGTGATGAAGTTGGCTCTGTTTCTGAGCACC<br>CATAGCAATACCAATCAGGTGATCAAAACCATGTTTGAAGAGGGTATTGAACGCAATGAAGTGTGC<br>AATGATCATACACCGGAAAATCTGACCAAAAATGCTGCATGGTATTGCTATAGCGTGTATTATTCAG<br>GCCAATCGTAATAGCAGCAGCGAAGAAATGGAAGAAAACCGCAAAATGGCTTCTGAAATATGCTGTGC<br>ATCTACAAATAA                                                                                                          |
| BM3R1     | Gene | ATGGAAAGCACCCCGACCAAAACGAAAAGCAAT TTTTAGCGCAAGCCTGCTGCTGTTTGCAGAACCT<br>GGTTTTGATGCAACCACCATGCCGATGATTCGAGAAAATGCAAAAGTTGGTGCAGGCACCATTAT<br>CGCTATTTTCAAAAACAAAGAAAGCCTGGTGAACGAACTGTTTTCAGCAGCATGTTAATGAATTTCTG<br>CAGTGATTTGAAAGCGGTCTGGCAAAATGAACGTGATGGTTATCGTGTATGGCTTTCATCACATTTT<br>GAAGGTATGGTGACCTTTACCAAAAATCATCCGCGTGCCTGGGTTTTATCAAAAACCATAGCCAG<br>GGCACCTTCTGACCGAAGAAAGCGCTGCGCATATCAGAAAAC TGGTTGAATTTGTGTGCACCTTT<br>TTTCTGAAAGGTGAGAAACAGGGTGTGATTCGTAATCTGCCGGA AAAATGCACCTGATTGCAATTTCTG<br>TTTGGCAGCTTTATGGAAGTGTATGAAATGATCGAGAACGATTATCTGAGCCTGACCGATGAACTG<br>CTGACCGGTGTTGAAGAAAGCCTGTGGGCAGCACTGAGCCGTGAGAGCTAA                                                                                                                                       |
| SrpR      | Gene | ATGGCACGTAAAACCGCAGCAGAGAAGCAGAAAGAAACCCGTCAGCGTATTATTGATGCAGCACTGGAA<br>GTTTTTGTGTCACAGGGTGTAGTGATGCAACCC TGGATCAGATTGCACGTAAAGCCGGTGTACC<br>CGTGGTGCAGTTTTATTGGCATTTTAATGGTAAACTGGAAGTTC TGCAGGCAGTTCTGGCAAGCCGT<br>CAGCATCCGCTGGAAC TGGATTTTACACCGGATCTGGGTATTGAACGTAGCTGGGAAGCAGTTGTT<br>GTTGCAATGCTGGATGCAGTTTATAGTCCGCAGAGCAAAACAGTTTAGCGAAAATCTGATTTATCAG<br>GGTCTGGATGAAAGCGGTCTGATTCATAATCGTATGGTT CAGGCAAGCGATCGTTTTCTGCAGTAT<br>ATTCATCAGGTTCTGCGTATGCAGTTACCCAGGGTGA ACTGCCGATTAACTGGATCTGCAGACC<br>AGCATGGTGTTTTTAAAGGTCTGATTACCGGTCTGCTGTATGAAGGTCTGCTGAGCAAAAGATCAG<br>CAGGCACAGATTTACAAAGTGCACCTGGGTAGCTTTTGGGCATCTTGGCTGAAACCGCCTCGTTTT<br>CTGCTGTGTGAAGAAGCACAGATTAACAGGTGAAATCCTTCGAATAA                                                                      |
| PhIF      | Gene | ATGGCACGTACCCCGAGCCGTAGCAGCATTGGT AGCCTGCGTAGTCCGCATACCATAAAAGCAATT<br>CTGACCAGACCATTGAAATCCTGAAAGAAATG TGGTTATAGCGTCTGAGCATTGAAAGCGTTGCA<br>CGTCGTGCCGGTGAAGCAAAACCGACCAATTTATCGTTGGTGGACCAATAAAGCAGCATTGATGGC<br>GAAGTGATGAAAATGAAAGCGAACAGGTGCGTAAATTTCCGGATCTGGGTAGCTTTAAAGCCGAT<br>CTGGATTTTCTGCTGCGTAACTGTGGAAAAGTTTGGCGTGA AACCATTTGTGGTGAAGCATTTCTG<br>TGTGTTATTGCAGAAAGCAGACTGGACCTGCAACCC TGAACCCAGCTGAAAGATCAGTTTATGGAA<br>CGTCGTGCTGAGATGCCGAAAAAAGTGGTTGAAAATGCCATTAGCAATGGTGAAC TGCCGAAAGAT<br>ACCAATCGTGAAC TGCCTGCTGGATATGATTTTTGGTTTTTGGTGTATCGCTGCTGACCGAAGCAG<br>CTGACCGTTGAACAGGATATTGAAGAATTTACCTCTCTGCTGATTAATGGTGTTTGTCCGGGTACA<br>CAGCGTTAA                                                                                                              |
| YFP       | Gene | ATGGTGAGCAAGGGCGAGGAGCTGTTACCCGGG TGGTGCCATCCTGGTGCAGCTGGACGGCGAC<br>GTA AACCGCCACAAGTTCAGCGTGTCCGGCGAGGGCGAGGGCGATGCCACCTACGGCAAGCTGACC<br>CTGAAGTTTCATCTGCACCAACCGCAAGCTGCCCGTGCCTGGCCACCCCTCGTGACCACCTTCGGC<br>TACGGCTGCAATGCTTCGCCCGCTACCCCGACCA CATGAAGCTGCACACTTCTCAAGTCCGCC<br>ATGCCGAAGGCTACGTCCAGGAGCGCACCATCTTCTTCAAGGACGACGGCAACTACAAGACCCGC<br>GCCGAGGTGAAGTTCGAGGGCGACACCTGGTGAACCGCATCGAGCTGAAGGGCATCGACTTCAAG<br>GAGGACGGCAACATCCTGGGGCAAGCTGGAGTACA ACTACAACAGCCACAACGCTATATATCATG<br>GCCGACAAGCAGAAAGAACCGCATCAAGGTGAACTTCAAGATCCGCCACAACATCGAGGACGGCAGC<br>GTGCAGCTCGCCGACACTACCAGCAGAACACCCCATCGGCGAGGGCCCGTGTGCTGCCCGAC<br>AACCACTACTGAGCTACCAGTCCGCCCTGAGCAAAAGACCCCAACGAGAAGCGCGATCACATGGTC<br>CTGCTGGAGTTCTGTGACCGCCGCCGGATCACTCTCGGATGGACGAGCTGTACAAGTAA |
| TetR      | Gene | ATGTCCAGATTAGATAAAAAGTAAAGTGATTAACAGCGCATTAGAGCTGCTTAATGAGTCCGAAATC<br>GAAGGTTTTAACAAACCCGTAAACTCGCCCAAGCTAGGTGTAGAGCAGCTACATGATTTGGTATGGCAT<br>GTAAAAAATAAGCGGGCTTTGCTCGACGCC TTAGCCATTGAGATGTTAGATAGGCACCATACTCAC<br>TTTTGCCCTTTAGAAAGGGAAAGCTGGCAAGAT TTTTTACGTAATAACGCTAAAAGTTTTAGATGT                                                                                                                                                                                                                                                                                                                                                                                                                                                                                       |

|                    |          |                                                                                                                                                                                                                                                                                                                                                                                                                                                                                                                                                                                                                                                                                                                                                                                                                                                                                                                                                                                                                                                                                                                                                              |
|--------------------|----------|--------------------------------------------------------------------------------------------------------------------------------------------------------------------------------------------------------------------------------------------------------------------------------------------------------------------------------------------------------------------------------------------------------------------------------------------------------------------------------------------------------------------------------------------------------------------------------------------------------------------------------------------------------------------------------------------------------------------------------------------------------------------------------------------------------------------------------------------------------------------------------------------------------------------------------------------------------------------------------------------------------------------------------------------------------------------------------------------------------------------------------------------------------------|
|                    |          | GCTTTACTAAGTCATCGCGATGGAGCAAAGTACATTTAGGTACACGGCTACAGAAAAACAGTAT<br>GAAACTCTCGAAAATCAATTAGCCTTTTTATGCCAAACAAGTTTTTACTAGAGAATGCATTATAT<br>GCACTCAGCGCTGTGGGCATTTTACTTTAGGTTGCGTATTGGAAGATCAAGAGCATCAAGTCGCT<br>AAAGAAGAAAGGGAAACCTACTACTGATAGTATGCCGCCATTATTACGACAAGCTATCGAATTA<br>TTTGATCACAAGGTGCAGAGCCAGCCTTCTTATTCGGCCTTGAATTGATCATATGCGGATTAGAA<br>AAACAACCTAAATGTGAAAGTGGGTCTAA                                                                                                                                                                                                                                                                                                                                                                                                                                                                                                                                                                                                                                                                                                                                                                         |
| LacI               | Gene     | ATGAAACCAGTAACGTTATACGATGTGCGAGAGTATGCCGGTGTCTCTTATCAGACCGTTTTCCCGC<br>GTGGTGAACCAGGCCAGCCACGTTTTCTGCGAAAACGCGGGAAAAAGTGAAGCGGGCATGGCGGAG<br>CTGAATTACATTTCCAACCGCGTGGCACAACTGGCGGGCAAACAGTCGTTGCTGATGGCGTT<br>GCCACCTCCAGTCTGGCCCTGCACGCGCGTTCGCAAATGTCGCGGGCATTAATCTCGCGCCGAT<br>CAACTGGGTGCCAGCGTGGTGGTGTGATGGTAGAACGAAAGCGCGCTCGAAGCCTGTAAGCGGGC<br>GTGCACAATCTTCTCGCGCAACGCGTCACTGGGCTGATCATTAACTATCCGCTGGATGACCAGGAT<br>GCCATTGCTGTGGAAGCTGCCTGCACTAATGTTCCGGCGTTATTTCTTGATGTCTGATCCAGACA<br>CCCATCAACAGTATTATTTCTCCCATGAGGACGGTACGCGACTGGGCGTGGAGCATCTGGTCGCA<br>TTGGGTCAACAGCAATCGCGCTGTAGCGGGCCCATTAAGTTCTGTCTCGCGCGCTGCGTCTG<br>GCTGGCTGGCATAAATATCTCACTGCAATCAAATTCAGCCGATAGCGGAACGGGAAGGCGACTGG<br>AGTGCCATGTCCGGTTTTCAACAACCAATGCAAAATGCTGAATGAGGGCATCGTTCCCATGCGATG<br>CTGTTGCAACGATCAGATGGCGCTGGGCGCAATGCGCGCCATTACCAGTCCGGGCTGCGCGTT<br>GGTGCGGATATCTCGGTAGTGGGATACGACGATACCGAAGATAGTCTATGTTATATCCCGCCGTTA<br>ACCACCATCAAACAGGATTTTCGCTGCTGGGGCAAACAGCGCTTGGTGCAACTCTCT<br>CAGGGCCAGGCGGTGAAGGGCAATCAGCTGTTGCCAGTCTCACTGGTAAAAAGAAAAACCCCTG<br>GCGCCAAATACGCAACCGCCTTCCCGCGCGTTGGCCGATTATTAATGCAGCTGGCACGACAG<br>GTTTCCCGACTGGAAAGCGGGCAGTGA |
| AraC               | Gene     | ATGGCTGAAGCGCAAAATGATCCCTGCTGCCGGGATACTCGTTAATGCCATCTGGTGGCGGGT<br>TTAACCGCGATTGAGGCCAACGGTTATCTCGATTTTTTTATCGACCGACCGCTGGGAATGAAAGGT<br>TATATTCTCAATCTCACCATTCTCGCGGTAGGGGGTGGTGA AAAATCAGGGACGAGAATTTGTTTGC<br>CGACCGGGTGATATTTTGTGTTCGCCGAGGAGATTATCACTACGGTCTCATCCGGAGGCT<br>CGGAATGATATCACCAGTGGGTTACTTTCTGTCGCGCGCCTACTGGCATGAATGGCTTAACCTGG<br>CCGTCAATATTTGCCAATACGGGGTCTTTTCGCCCGGATGAAGCGCACCGCCGATTTTCAGCGAC<br>CTGTTTGGCAAAATCATTAAACGCGGGCAAGGGGAAGGGCGCTATTCCGAGCTGTGGCGATAAAT<br>CTGCTTGAGCAATGTTACTGCGCGCATGGAAGCGATTAAACGAGTCTCCATCCACCGATGGAT<br>AATCGGGTACGCGAGGCTTGTGAGTACATCAGCGATCACCCTGGCAGACAGCAATTTTGATATCGCC<br>AGCGTCGCACAGCATGTTTGTGTCGCGCTCGGCTGTGTCACATCTTTCCGCCAGCAGTTAGGG<br>ATTAGCGTCTTAAGCTGGCGCGAGGCAACGATCAGCCAGGCGAAGGTCGTTTTGAGCACCACC<br>CGGATGCCATCGCCACCGTTCGGTTCGCAATGTTGGTTTTGACGATCAACTCTATTTCTCGCGGTA<br>TTTAAAAAATGCACCGGGGCCAGCCGAGCGAGTTCGCTGCCGGTTGTGAAGAAAAAGTGAATGAT<br>GTAGCCGTCAGTTGTCATAA                                                                                                                                                                                                              |
| P <sub>Tac</sub>   | Promoter | TGTTGACAATTAATCATCGGCTCGTATAATGTGTGGAATTGTGAGCGCTCACAAAT                                                                                                                                                                                                                                                                                                                                                                                                                                                                                                                                                                                                                                                                                                                                                                                                                                                                                                                                                                                                                                                                                                     |
| P <sub>Tet</sub>   | Promoter | TTTTTTCCCTATCAGTGATAGAGATTGACATCCCTATCAGTGATAGAGATAATGAGCAC                                                                                                                                                                                                                                                                                                                                                                                                                                                                                                                                                                                                                                                                                                                                                                                                                                                                                                                                                                                                                                                                                                  |
| P <sub>BAD</sub>   | Promoter | ACTTTTCATACTCCGCCATTCAGAGAAGAAACCAATTTGTCATATTGCATCAGACATTCGCCGTA<br>CTGCGTCTTTTACTGGCTCTTCTCGCTAACCAACCGGTAACCCCGCTTATTAAGCATTTCTGTA<br>ACAAAGCGGGACCAAGCCATGACAAAAACGCGTAACAAAAGTGTCTATAATCAGGCAAGAAAGT<br>CCACATTGATTATTTGCACGGCGTCACACTTTGCTATGCCATAGCATTTTTATCCATAAGATTAGC<br>GGATCCTACTGACGCTTTTATCGCAACTCTCTACTGTTTCTCCATACCCGTTTTTTTGGGCTAG<br>C                                                                                                                                                                                                                                                                                                                                                                                                                                                                                                                                                                                                                                                                                                                                                                                                     |
| P <sub>BM3R1</sub> | Promoter | TCTGATTTCGTTACCAATTGACGGAATGAACGTTTCAATCCGATAATGCTAGC                                                                                                                                                                                                                                                                                                                                                                                                                                                                                                                                                                                                                                                                                                                                                                                                                                                                                                                                                                                                                                                                                                        |
| P <sub>AmtR</sub>  | Promoter | GATTTCGTTACCAATTGACAGTTTCTATCGATCTATAGATAATGCTAGC                                                                                                                                                                                                                                                                                                                                                                                                                                                                                                                                                                                                                                                                                                                                                                                                                                                                                                                                                                                                                                                                                                            |
| P <sub>SrpR</sub>  | Promoter | GATTTCGTTACCAATTGACAGCTAGCTCAGTCTAGGTATATACATACATGCTTGTGTTGTTGTA<br>C                                                                                                                                                                                                                                                                                                                                                                                                                                                                                                                                                                                                                                                                                                                                                                                                                                                                                                                                                                                                                                                                                        |
| P <sub>LitR</sub>  | Promoter | GATTTCGTTACCAATTGACAAATTTATAAATTTGTCAGTATAATGCTAGC                                                                                                                                                                                                                                                                                                                                                                                                                                                                                                                                                                                                                                                                                                                                                                                                                                                                                                                                                                                                                                                                                                           |
| P <sub>PhIF</sub>  | Promoter | TCTGATTTCGTTACCAATTGACATGATACGAAACGTACCGTATCGTTAAGGT                                                                                                                                                                                                                                                                                                                                                                                                                                                                                                                                                                                                                                                                                                                                                                                                                                                                                                                                                                                                                                                                                                         |
| BydVJ              | Ribozyme | AGGGTGTCTCAAGGTGCGTACCTTGACTGATGAGTCCGAAAGGACGAAACACCCCTCTACAAATAA<br>TTTTGTTTTAA                                                                                                                                                                                                                                                                                                                                                                                                                                                                                                                                                                                                                                                                                                                                                                                                                                                                                                                                                                                                                                                                            |
| PlmJ               | Ribozyme | AGTCATAAGTCTGGGCTAAGCCACTGATGAGTCCGTAAGGACGAAACTTATGACCTCTACA<br>AATAATTTGTTTTAA                                                                                                                                                                                                                                                                                                                                                                                                                                                                                                                                                                                                                                                                                                                                                                                                                                                                                                                                                                                                                                                                             |
| SarJ               | Ribozyme | AGACTGTCCGGGATGTGTATCCGACCTGACGATGGCCAAAAGGGCCGAAACAGTCTCTACAAA<br>TAAATTTGTTTTAA                                                                                                                                                                                                                                                                                                                                                                                                                                                                                                                                                                                                                                                                                                                                                                                                                                                                                                                                                                                                                                                                            |
| RiboJ10            | Ribozyme | AGCGCTCAACGGGTGTGCTTCCCGTTCTGATGAGTCCGTGAGGACGAAAGCGCCTCTACAAATAA<br>TTTTGTTTTAA                                                                                                                                                                                                                                                                                                                                                                                                                                                                                                                                                                                                                                                                                                                                                                                                                                                                                                                                                                                                                                                                             |

|                  |                               |                                                                                                                   |
|------------------|-------------------------------|-------------------------------------------------------------------------------------------------------------------|
| RiboJ53          | Ribozyme                      | AGCGGTCAACGCATGTGCTTTGCGTTCTGATGAGACAGTGATGTCGAAACCGCCTCTACAAATAAT<br>TTTGTTTAA                                   |
| RiboJ            | Ribozyme                      | AGCTGTCACCGGATGTGCTTTCCGGTCTGATGAGTCCGTGAGGACGAAACAGCCTCTACAAATAAT<br>TTTGTTTAA                                   |
| L3S2P55          | Terminator                    | CTCGGTACCAAAGACGAACAATAAGACGCTGAAAAGCGTCTTTTTTCGTTTTGGTCC                                                         |
| L3S2P24          | Terminator                    | CTCGGTACCAAATTCAGAAAAGACACCCGAAAGGGTGTTTTTTCGTTTTGGTCC                                                            |
| L3S2P11          | Terminator                    | CTCGGTACCAAATTCAGAAAAGAGACGCTTTCGAGCGTCTTTTTTCGTTTTGGTCC                                                          |
| ECK120029600     | Terminator                    | TTCAGCCAAAAAATAAGACCGCCGGTCTTGTCCTACTACCTTGCAGTAATGCGGTGGACAGGATC<br>GGCGTTTTCTTTCTCTCTCAA                        |
| ECK120033737     | Terminator                    | GGAAACACAGAAAAAGCCCGCACCTGACAGTGCGGGCTTTTTTTTCGACCAAAGG                                                           |
| L3S2P21          | Terminator                    | CTCGGTACCAAATTCAGAAAAGAGGCCGCCGAAAGGGGGCCTTTTTTCGTTTTGGTCC                                                        |
| BT1 <sup>a</sup> | Terminator<br>(Bidirectional) | <u>AAAGCCCCGGAAGATCACCTTCCGGGGCTTTTTTATTGCGCC</u> <b>CAAAGTAAAAACCGCGAAG</b><br><b>CGGGTTTTACGTAAACAGGTGAAACT</b> |

a. Forward terminator (ECK120033736) is underlined, and reverse terminator (ECK120010818) is in bold.

## Appendix References

Klumpp S, Zhang Z, Hwa T (2009) Growth rate-dependent global effects on gene expression in bacteria. *Cell* **139**: 1366-1375

Nielsen AAK, Der B, Shin J, Vaidyanathan P, Paralanov V, Strychalski EA, Ross D, Densmore D, Voigt CA (2016) Genetic circuit design automation. *Science* **352**: aac7341

Roberts A, Trapnell C, Donaghey J, Rinn LJ, Pachter L (2011) Improving RNA-Seq expression estimates by correcting for fragment bias. *Genome biology* **12**: R22

Robinson MD, Oshlack A (2010) A scaling normalization method for differential expression analysis of RNA-seq data. *Genome biology* **11**: R25
